# Supplementary material for: Androgen suppresses testicular cancer cell growth in vitro and in vivo
Source: PubMed Central journal article supplement (PMC5085223; doi:10.18632/oncotarget.9109), 2016-04-29
Supplement: oncotarget-07-35224-s001.pdf [file oncotarget-07-35224-s001.pdf]

SUPPLEMENTARY FIGURE AND TABLES

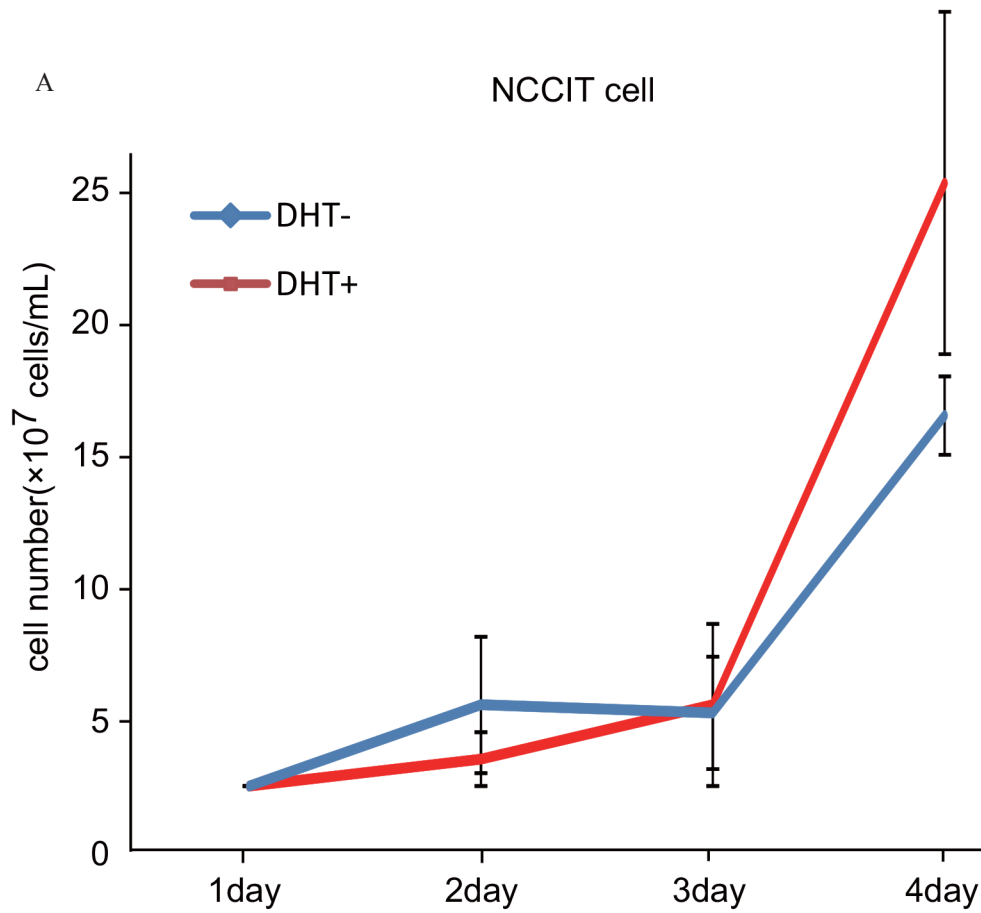

**Supplementary Figure S1: Cell proliferation was not suppressed by DHT treatment in NSE cells.** A. NSE cells were cultured in EtOH or DHT containing medium.growthNumber of cells was counted by the naked eye.

Supplementary Table S1: Clinicopathological features of 6 seminoma patients

| sample-ID | histology | age | level of tumor markers |      |     |     | stage |
|-----------|-----------|-----|------------------------|------|-----|-----|-------|
|           |           |     | hCG                    | hCGb | LDH | AFP |       |
| S-1       | seminoma  | 29  | 8                      | >0.1 | 183 | ND  | I     |
| S-2       | seminoma  | 72  | >0.4                   | >0.1 | 215 | 3.1 | I     |
| S-3       | seminoma  | 44  | >0.4                   | >0.1 | 166 | 4.4 | I     |
| S-4       | seminoma  | 46  | 64                     | 3.3  | 754 | 1.8 | IIB   |
| S-5       | seminoma  | 46  | <0.4                   | 0.3  | 338 | 6.7 | IIA   |
| S-6       | seminoma  | 57  | <0.4                   | <0.1 | 268 | 2.8 | IIA   |

Supplementary Table S2: Microarray analysis of gene expression in SE samples and TCam-2 cells

| Probe Name     | FC ([normal tissue] vs [cancer tissue]) | FC ([TCam-2 without DHT treatment] vs [TCam-2 with DHT treatment]) | Gene Symbol  | Description                                                                                                      |
|----------------|-----------------------------------------|--------------------------------------------------------------------|--------------|------------------------------------------------------------------------------------------------------------------|
| A_33_P3221059  | -4.9043984                              | 2.1606202                                                          |              |                                                                                                                  |
| A_19_P00323034 | -4.716373                               | 6.2507515                                                          |              | Homo sapiens, clone IMAGE:5528960, mRNA. [BC047326]                                                              |
| A_23_P150595   | -4.62728                                | 2.058645                                                           | TPH1         | Homo sapiens tryptophan hydroxylase 1 (TPH1), mRNA [NM_004179]                                                   |
| A_33_P3227706  | -4.2695093                              | 2.463157                                                           | OR2Z1        | Homo sapiens olfactory receptor, family 2, subfamily Z, member 1 (OR2Z1), mRNA [NM_001004699]                    |
| A_24_P236753   | -4.2422023                              | 2.1813443                                                          | DOC2B        | Homo sapiens double C2-like domains, beta (DOC2B), mRNA [NM_003585]                                              |
| A_23_P151598   | -4.0110717                              | 2.134196                                                           | CPNE6        | Homo sapiens copine VI (neuronal) (CPNE6), transcript variant 2, mRNA [NM_006032]                                |
| A_33_P3262083  | -3.7374272                              | 2.055334                                                           | LOC100126784 | Homo sapiens uncharacterized LOC100126784 (LOC100126784), long non-coding RNA [NR_015384]                        |
| A_21_P0007333  | -3.7079165                              | 3.9919052                                                          |              |                                                                                                                  |
| A_19_P00322673 | -3.57439                                | 2.299535                                                           |              |                                                                                                                  |
| A_21_P0005334  | -3.5739617                              | 2.4692082                                                          |              |                                                                                                                  |
| A_21_P0002562  | -3.3141341                              | 3.1461248                                                          |              |                                                                                                                  |
| A_33_P3358469  | -3.0831363                              | 2.3644578                                                          | GLI2         | Homo sapiens GLI family zinc finger 2 (GLI2), mRNA [NM_005270]                                                   |
| A_21_P0006021  | -2.888067                               | 5.162127                                                           |              |                                                                                                                  |
| A_21_P0012123  | -2.8870552                              | 2.394399                                                           | LOC100505663 | PREDICTED: Homo sapiens uncharacterized LOC100505663 (LOC100505663), transcript variant X2, misc_RNA [XR_109600] |
| A_21_P0008582  | -2.655965                               | 2.1198006                                                          |              |                                                                                                                  |
| A_33_P3383561  | -2.638577                               | 2.0946505                                                          | POLR2F       | polymerase (RNA) II (DNA directed) polypeptide F [Source:HGNC Symbol;Acc:9193] [ENST00000443002]                 |
| A_21_P0012973  | -2.4357421                              | 6.7362804                                                          |              | AGENCOURT_13890273 NIH_MGC_147 Homo sapiens cDNA clone IMAGE:30346469 5', mRNA sequence [CD110012]               |
| A_33_P3282733  | -2.3486636                              | 2.3506603                                                          | LOC100131395 | PREDICTED: Homo sapiens uncharacterized LOC100131395 (LOC100131395), misc_RNA [XR_110093]                        |
| A_33_P3403102  | -2.2755005                              | 3.519007                                                           | PRR18        | Homo sapiens proline rich 18 (PRR18), mRNA [NM_175922]                                                           |

This table shows 19 genes, which increased in SE tumor samples and decreased by DHT treatment in TCam-2 cells.

**Supplementary Table S3: Microarray analysis of gene expression in SE samples.** The genes, which showed increase in tumor tissues compared to in normal tissues, are showed in this table.

See Supplementary File 1
